# Supplementary figures and images for: Co-treatment with sulforaphane–zein microparticles enhances the chemopreventive potential of zinc in a 1,2-dimethylhydrazine induced colon carcinogenesis rat model
Source: Royal Society of Chemistry journal article supplement (doi:10.1039/c6ra02355j), 2016-01-01

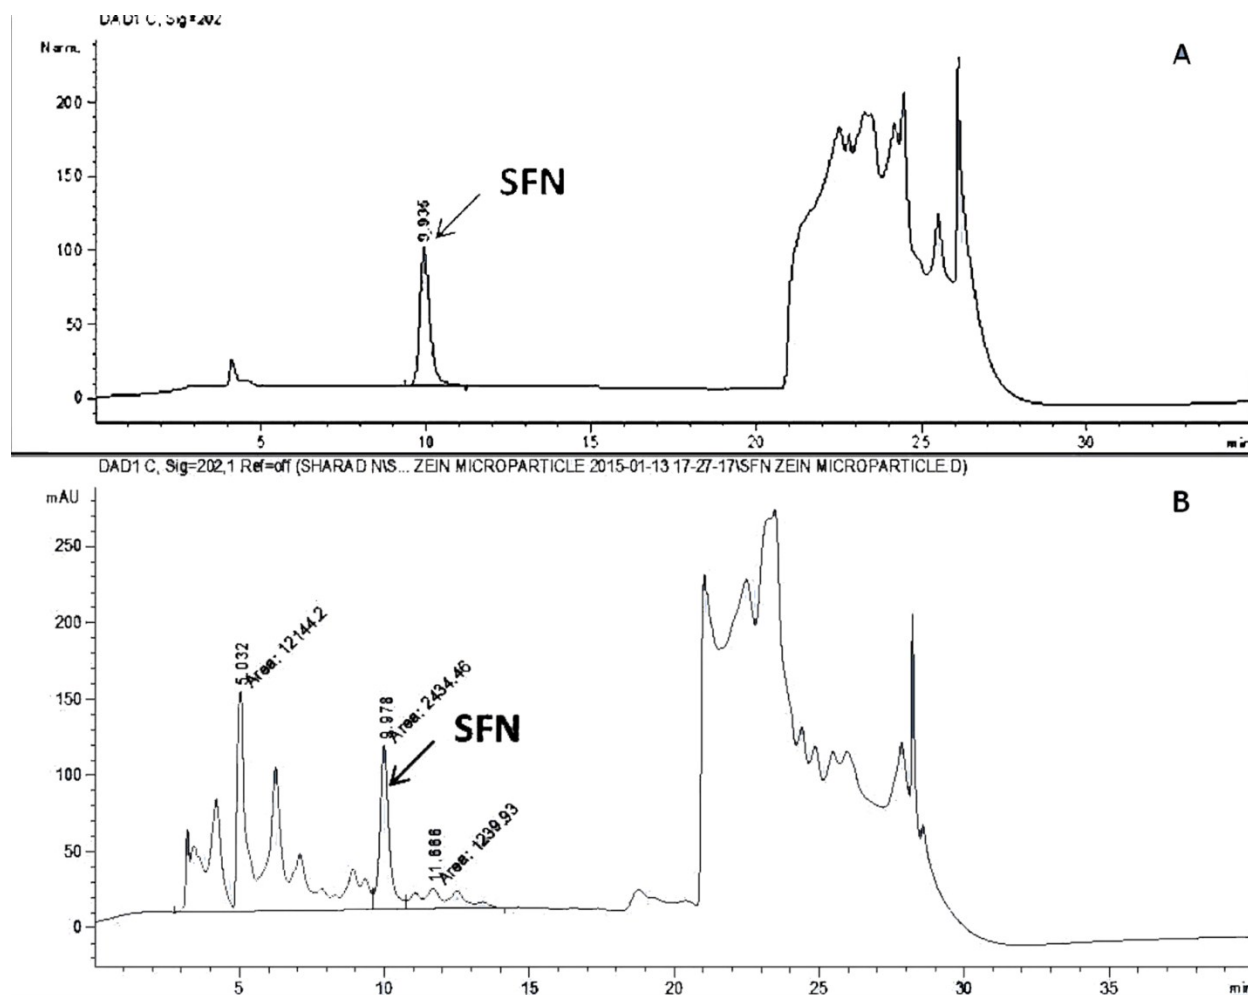

Figure S1

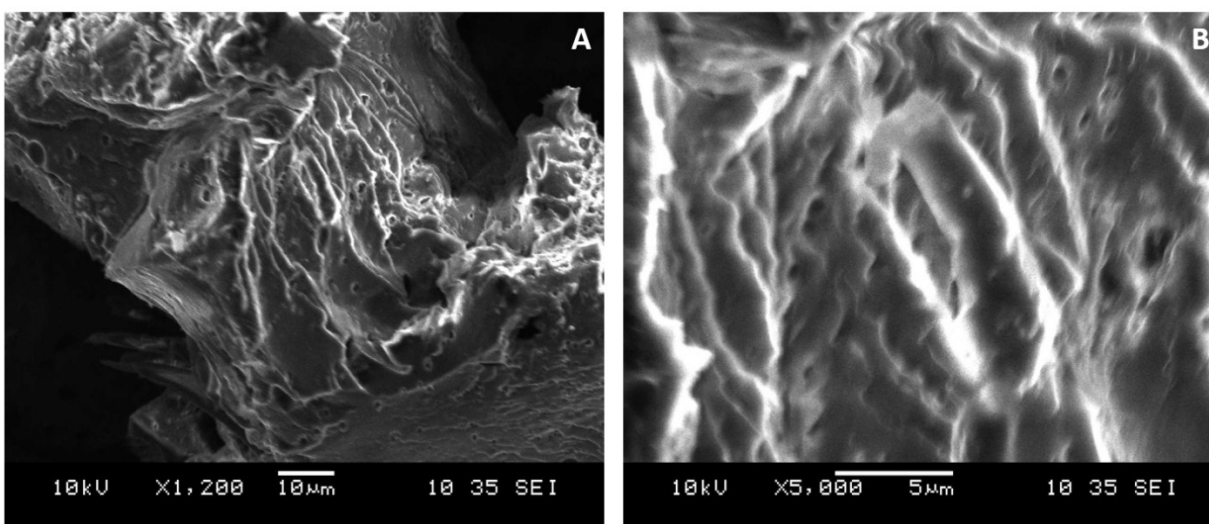

Figure S2

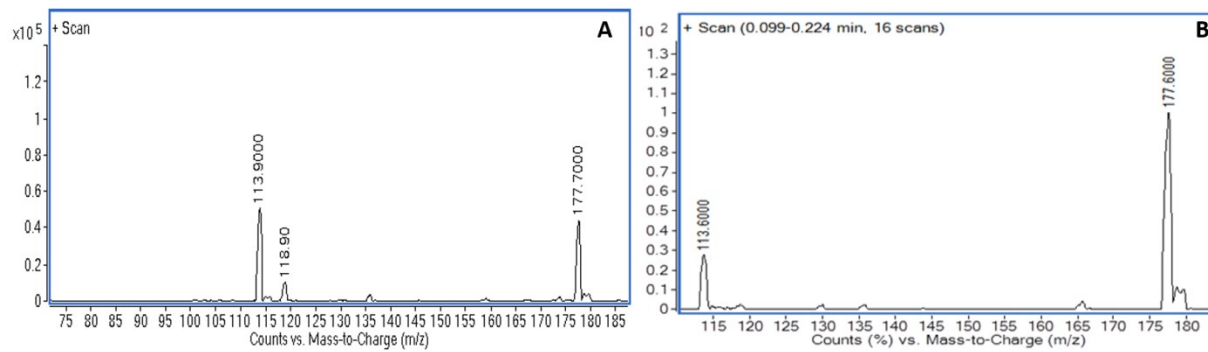

Figure S3

Supplement: c6ra02355j1.pdf [file c6ra02355j1.pdf]
